# Supplementary material for: Better Ask Than Tell: Responses to mHealth Interrogative Reminders and Associations With Colorectal Cancer Screening Subsequent Uptake in a Prospective Cohort Intervention
Source: PubMed Central journal article supplement (PMC6360382; doi:10.2196/mhealth.9351), 2019-01-21
Supplement: mhealth_v7i1e9351_app1.pdf [file mhealth_v7i1e9351_app1.pdf]

## Appendix 1

### Text messages used in the parent study

| Experimental condition |                                    | Phrasing of text sent                                                                                                                                                  |
|------------------------|------------------------------------|------------------------------------------------------------------------------------------------------------------------------------------------------------------------|
| 1.                     | Interrogative                      | "Following the invitation to screen for CRC, recently sent to you, do you intend to mail-order an FOBT kit and be tested? At your service, CHS"                        |
| 2.                     | Interrogative + social context     | "Following the invitation to screen for CRC, recently sent to you, do you intend to mail-order an FOBT kit and be tested, as others your age do? At your service, CHS" |
| 3.                     | Non-interrogative                  | "Following the invitation to screen for CRC, recently sent to you -- it is important to mail-order a kit and be tested. At your service, CHS"                          |
| 4.                     | Non-interrogative + social context | "Following the invitation to screen for CRC, recently sent to you -- people your age mail-order an FOBT kit and undergo the test. At your service, CHS"                |
| 5.                     | No intervention                    | None                                                                                                                                                                   |
