# Supplementary material for: Better Ask Than Tell: Responses to mHealth Interrogative Reminders and Associations With Colorectal Cancer Screening Subsequent Uptake in a Prospective Cohort Intervention
Source: PubMed Central journal article supplement (PMC6360382; doi:10.2196/mhealth.9351), 2019-01-21
Supplement: mhealth_v7i1e9351_app2.pdf [file mhealth_v7i1e9351_app2.pdf]

## Appendix 2

### Mediation analysis: Syntax, conceptual model, statistical model and results of the path model

#### Mplus syntax:

```
<
variable:
    names = id_num X_SMS_TY C4_PreF0 M_SMS_re Y_F0_per
           C1_Female C2_age60N C3_SES_2 C3_SES_3;
    categorical = M_SMS_re Y_F0_per;! binary outcome and mediator
    usevar = X_SMS_TY C4_PreF0 M_SMS_re Y_F0_per
           C1_Female C2_age60N C3_SES_2 C3_SES_3;;

MISSING ARE ALL(-1234);

Analysis:
    estimator = ml;
    link = probit;

model:
    M_SMS_re on X_SMS_TY
           C1_Female C2_age60N C3_SES_2 C3_SES_3 C4_PreF0;

    Y_F0_per on X_SMS_TY M_SMS_re
           C1_Female C2_age60N C3_SES_2 C3_SES_3 C4_PreF0;

model indirect:
    Y_F0_per ind M_SMS_re X_SMS_TY;

output:
    tech1 tech8 sampstat patterns cinterval;
```

Figure 1  
The conceptual model

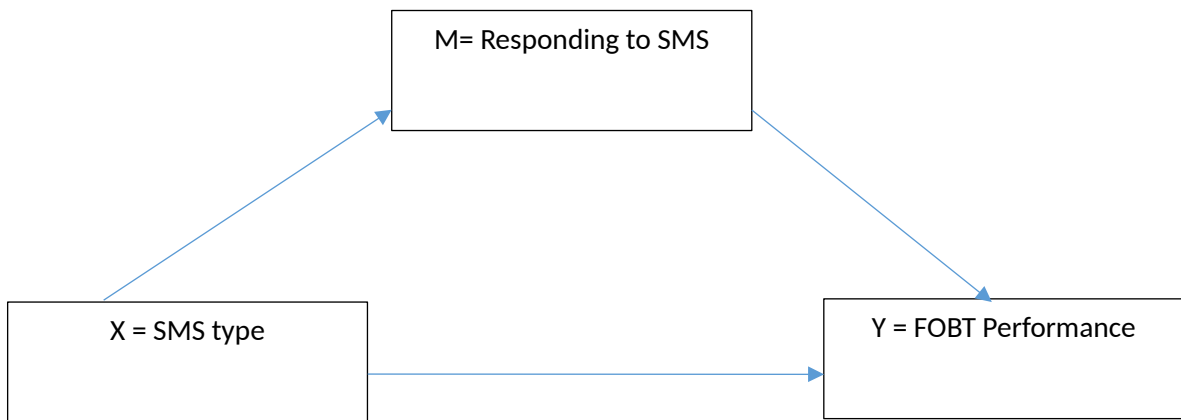

Figure 2  
The statistical model

Main Results of the Path Model (Unstandardized Coefficients with Standard Errors in Parentheses; Control Variables are not Depicted; \*\*\* p < .001)

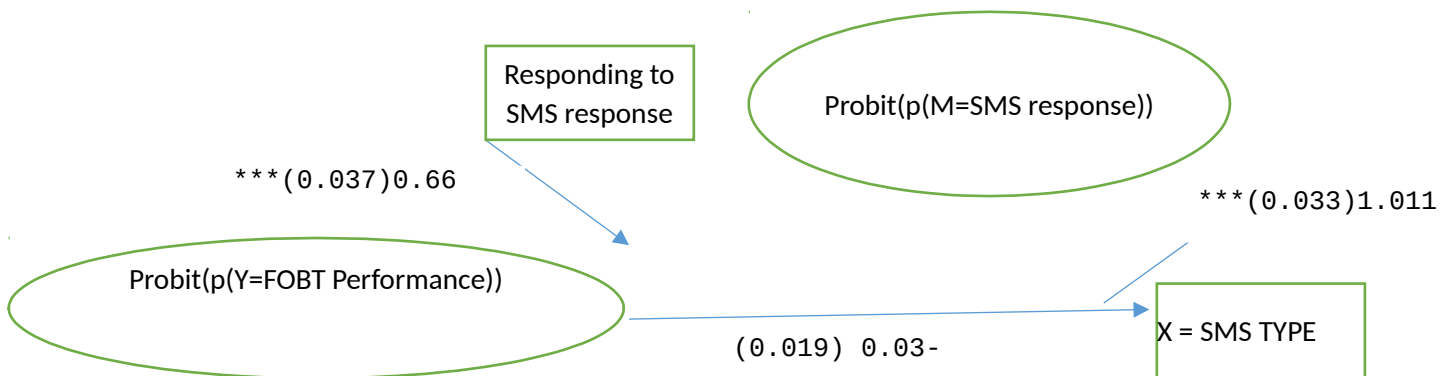

Table 1  
Results of the Path Analysis Model

|                     | Responding to SMS |        | FOBT Performance |       |  |
|---------------------|-------------------|--------|------------------|-------|--|
|                     | B                 | SE     | B                | SE    |  |
| Gender, female a    | 0.029             | 0.025  | 0.073***         | 0.018 |  |
| Age, b              | -0.080***         | 0.025  | -0.029           | 0.019 |  |
| SES, c              | 0.183***          | 0.033* | -0.024           | 0.022 |  |
| SES, d              | 0.398***          | 0.035  | -0.102***        | 0.025 |  |
| Past FOBT testing e | 0.263***          | 0.027  | 0.663***         | 0.019 |  |
| SMS Type            | 1.011***          | 0.033  | -0.032           | 0.019 |  |
| Responding to SMS   | --                |        | 0.663***         | 0.037 |  |

*Note.* N = 38364; unstandardized coefficients are shown; a 0 = male, 1 = female; b 0 = age under or equal to 60, 1 = age above 60; c 0 = Low or high SES, 1 = medium SES; d 0 = Low or medium SES, 1 = high SES; e 0 = No Previous FOBT, 1 = Yes Previous FOBT; .p < .05; \*\* p < .01 \*
